# Supplementary material for: Prevalence of anti-leptospiral IgM and detection of pathogenic Leptospira species DNA in neonates presenting with clinical sepsis in Southwestern Uganda
Source: Eur J Med Res. 2022 Dec 2;27:268. doi: 10.1186/s40001-022-00902-w (PMC9716676; doi:10.1186/s40001-022-00902-w)
Supplement: Supplementary file 1 — Additional file 1: Table S1. Leptospirosis raw data 1-Data showing participants’ characteristics and demographic information. [file 40001_2022_902_MOESM1_ESM.xlsx]

## Sheet: Sheet1
ID	Sex	AgeB	Weight	AgeM	Gest	Occup M	Occup F	Durat ill	Bruises	Antibiotics	FeverM	Rats	Livestock	Baby Hold	Hand wash	Cordapply	WaterBoiled	Applybath	Watersource	LocatStream	PCR	IgM ELISA
H01	F	19	3	23		House wife	Busines man	24	Yes	No		Yes	Yes	2	Yes	No			Ground water	Yes	Negative
H02	M	1	4	28	38	House wife	Busines man	24	No	No	Yes	Yes	Yes	2	Yes	Yes	Yes	Yes	Tap water	Yes	Negative	Nonreactive
H03	F		4		39	Teacher		72				Yes	Yes	2		No	Yes		Ground water	Yes	Negative	Nonreactive
H04	F	21	3.5	19	40	Hair dresser	Teacher	48	Yes	No		Yes	Yes	4	Yes		No	Yes	Tap water	Yes	Negative
H05	F	16	4	30	38	House wife	Herdsman	72	Yes	No	Yes	Yes	Yes	4	No	Yes	No	Yes	Ground water	Yes	Negative	Nonreactive
H06	F	4	3	20	38	House wife	Busines man	48	Yes	No	No	Yes	Yes	4	No	No	No	No	Tap water	Yes	Negative	Nonreactive
H07	M	7	3	20	39	Farmer	Farmer	168	Yes	No	No	Yes	Yes	4	No	Yes	Yes	Yes	Ground water	Yes	Negative	Nonreactive
H08	M	3	3.3	28	40	Manager	Technician	72	No	Yes	No	Yes	Yes	4	Yes	No	Yes	No	Ground water	Yes	Negative	Nonreactive
H09	M	7	2	22	40	Farmer	Farmer	168	Yes	Yes	Yes	No	Yes	3	No	No	Yes	No	Ground water	Yes	Negative
H10	M	4	3.4	30	40	Business lady	Engineer	48	Yes	Yes	No	Yes	No	3	No	No	Yes	No	Tap water	No	Negative	Nonreactive
H11	F	2	3	26	39	Credit officer	Busines man	24	Yes	No	No	No	Yes	4	Yes	No	Yes	No	Tap water	No	Negative	Nonreactive
H12	M	27	5	35	40	Farmer	Herdsman	336	Yes	No		Yes	Yes	2	Yes		Yes	No	Swamp	Yes	Negative	Nonreactive
H13	M	7	3.5	24		Teacher	Teacher	168	Yes	No		Yes	Yes	2			Yes	Yes	Ground water	Yes	Negative	Nonreactive
H14	F	2	3	25	40	Farmer	Farmer	48	Yes	Yes		Yes	No	4		Yes		Yes	stream/River	Yes	Negative	Nonreactive
H15	M	5	2	32	40	Farmer	Herdsman	72	Yes	No	Yes	Yes	Yes	4	Yes	Yes	Yes	Yes	Tap water	No	Negative
H16	F	3	4	38	39	Business lady	Busines man	24	Yes	No	Yes	Yes	Yes	4	No	No	Yes	No	Tap water	Yes	Negative	Nonreactive
H17	F	23	3	28	40	Farmer	Herdsman		Yes	No	Yes	Yes	Yes	4	No	Yes	Yes	Yes	Well	No	Negative	Nonreactive
H18	F	2	6	20	39	Farmer	Herdsman		Yes	No		Yes	Yes	4	No	Yes	Yes	Yes	Tap water	Yes	Negative	Nonreactive
H19	F	5	3	26	40	Farmer	Farmer	24	Yes	No	Yes	Yes	No	4	No	Yes	Yes	No	Well	Yes	Negative	Nonreactive
H20	M	1	3		40	Farmer	Herdsman	24	No	No	Yes	Yes	Yes	4	No	Yes	Yes	No	Well	Yes	Negative	Nonreactive
H21	F	1	3	28	39	Farmer	Teacher	24	Yes	No		Yes	Yes	4	No	No	Yes	Yes	Tap water	Yes	Negative	Nonreactive
H22	F	26	3.18	18	40	Farmer	Herdsman	168	Yes	No		Yes	Yes	4	No	Yes	No	Yes	Well	Yes	Negative	Nonreactive
H23	F	11	3		38	Farmer	Herdsman		Yes	No		Yes	Yes	3	No	No	Yes	Yes	Ground water	Yes	Negative	Nonreactive
H24	M	1	3.5		39	Teacher	Teacher	24	Yes	No		Yes	Yes	1	No	No	Yes	No	Tap water	No	Negative	Nonreactive
H25	F	3	3	36	38	House wife	Farmer	24	Yes	No	No	Yes	Yes	2	No	No	Yes	No	Tap water	Yes	Negative	Nonreactive
H26	F	1	3	24	38	House wife	Herdsman	24	Yes	Yes	No	Yes	Yes	1		Yes	Yes	No	stream/River	Yes	Negative	Nonreactive
H27	M	10	3	23	39	House wife	Busines man	240	Yes	No		Yes	No	2	No	Yes	Yes	Yes	Tap water	No	Negative	Nonreactive
H28	F	13	3	35	40	Secretary	Veterinarian	48	Yes	No		Yes	Yes	1	No		No	No	Tap water	Yes	Negative	Nonreactive
H29	M	2	4	26	38	Factory worker	Factory worker	48	No	No	Yes	Yes	No	2	No	No	No	No	Tap water	Yes	Negative	Reactive
H30	F	11	3	28	40	House wife	Busines man	96	Yes	Yes	No	Yes	Yes	2		No	Yes	No	stream/River	Yes	Negative	Nonreactive
H31	M	24	3	30	39	House wife	Busines man	336	Yes	No	No	Yes	Yes	2	No	Yes	No	Yes	Tap water	No	Negative	Nonreactive
H32	M	1	2.9	26	40	House wife	Busines man	24	No	No	No	Yes	No	1	No	No	No	No	Tap water	No	Negative	Nonreactive
H33	F	4	1.7	38	37	Farmer	Busines man	96	No	No	Yes	Yes	Yes	2	No	Yes	Yes	No	Tap water	No	Negative
H34	F	2	2.1	22	40	Farmer	Farmer			No	Yes	Yes	Yes	3	No	Yes	No	Yes	Springs	No	Negative	Nonreactive
H35	M	21	2.7	29	39	Farmer	Farmer		Yes	No		Yes	No	2	Yes	Yes	Yes	Yes	Well	No	Negative	Nonreactive
H36	F	2	3	28	39	Teacher	Busines man	24	Yes	No	Yes	Yes	No	1	No	No	Yes	No	Tap water	No	Negative	Nonreactive
H37	F	2	2.7	25	39	Farmer	Busines man	24	Yes	No	No	Yes	No	2	No	No	Yes	Yes	Ground water	Yes	Negative	Nonreactive
H38	F	2	3	23	38	House wife	Plumber	24	No	No	Yes	Yes	No	1	No	No	No	Yes	Tap water	No	Negative	Nonreactive
H39	M	2	2	21	39	Farmer	Farmer	48	Yes	No	No	Yes	Yes	2	No	Yes	Yes	No	Ground water	No	Negative	Nonreactive
H40	M	8	4	18	39	Student	Busines man	72	Yes	No	No	No	No	2	No	No	Yes	No	Tap water	No	Negative	Nonreactive
H41	M	6	4	30	40	Teacher	Busines man	72	Yes	No	No	No	No	2	No	No	Yes	No	Tap water	Yes	Negative	Nonreactive
H42	M	1	3	18	38	Farmer	Farmer	24	No	No	Yes	Yes	Yes	3	No	Yes	Yes	No	Tap water	No	Negative	Nonreactive
H43	M	28	3	31	39	Farmer	Farmer	24	Yes	No	No	Yes	Yes	4	No	Yes	Yes	Yes	Ground water	Yes	Negative
H44	F	2	2	38	39	Farmer	Farmer	24	Yes	No	Yes	Yes	Yes	2	No	No	Yes	No	Ground water	No	Negative	Nonreactive
H45	F	3	3	38	39	Farmer	Farmer	48	Yes	No	Yes	No	No	2	No	Yes	No	Yes	Tap water	No	Negative	Nonreactive
H46	M	2	4	28	38	Farmer	Busines man	24	No	No	Yes	Yes	Yes	3	No	No	Yes	No	Tap water	No	Negative	Nonreactive
H47	F	7	3	38	40	Farmer	Farmer	48	Yes	No	No	Yes	Yes	4	No	Yes	No	Yes	Tap water	Yes	Negative	Reactive
H48	M	2	4	35	38	Farmer	Farmer	48	Yes	No	No	Yes	Yes	4	No	Yes	No	Yes	Ground water	No	Negative	Nonreactive
H49	M	18	4	18	40	Farmer	Herdsman	120	Yes	No	Yes	Yes	Yes	4	No	No	Yes	No	Ground water	Yes	Negative	Nonreactive
H50	F	2	3	23	38	Farmer	Farmer	24	Yes	No	Yes	Yes	No	1	No	No	No	No	Ground water	No	Negative	Nonreactive
H51	M	1	2.5	32	39	Farmer	Herdsman	24	Yes	No	Yes	No	Yes	2	No		Yes	No	Tap water	No	Negative	Nonreactive
H52	F	17	4	31	39	Farmer	Farmer	48	Yes	No	Yes	Yes	No	2	No	No	Yes	No	Tap water	No	Negative	Nonreactive
H53	M	3	3	30	40	House wife	Busines man	48	Yes	No	No	No	Yes	4	No	No	Yes	No	Tap water	No	Negative	Nonreactive
H54	F	3	2.8	28	38	Farmer	Herdsman	48	No	No		No	Yes	4	No	Yes	Yes	No	Ground water	Yes	Negative	Nonreactive
H55	M	3	3		40	Pharmacist	Farmer	24	Yes	No	No	No	Yes	3	Yes	No	Yes	No	Tap water	No	Negative	Reactive
H56	M	3	3	18	39	Farmer	Farmer	48	Yes	No	Yes	Yes	Yes	3	No	Yes		Yes	Tap water	No	Negative	Nonreactive
H57	F	3	3	40	39	Herdsman	Farmer	24	Yes	No	Yes	Yes	Yes	3	No	No	Yes	No	Tap water	No	Negative	Nonreactive
H58	F	11	2.6	24	38	Farmer	Herdsman	168	Yes	No	Yes	Yes	Yes	3	No	Yes	Yes	No	Tap water	No	Negative	Nonreactive
H59	M	2	2.4	32	39	Farmer	Herdsman	24	No	No	No	Yes	No	2	No	Yes	Yes	No	Tap water	No	Negative	Nonreactive
H60	F	2	4	23	38	Farmer	Farmer	24	Yes	No	Yes	Yes	Yes	2	No		No	No	Springs	No	Negative	Nonreactive
H61	F	8	1.7	17	39	Farmer	Herdsman		Yes	No	Yes	Yes	Yes	2	No	Yes	Yes	Yes	Ground water	No	Negative	Nonreactive
H62	M	17	3	30	40	Farmer	Farmer	48	Yes	No	No	Yes	Yes	2	No	No	Yes	Yes	Tap water	No	Negative	Nonreactive
H63	F	7	3	32	40	Farmer	Farmer	96	Yes	No	No	Yes	Yes	2	No	No	No	No	Tap water	No	Negative	Reactive
H64	M	2	3	20	39	Farmer	Busines man	24	Yes	No	No	Yes	Yes	3	No	No	Yes	No	Well	No	Negative	Nonreactive
H65	F	2	4	26	38	House wife	Herdsman	24	Yes	Yes	Yes	Yes	Yes	2	No	No	Yes	No	Tap water	Yes	Negative	Nonreactive
H66	M	7	3.3	25	39	Secretary	Farmer	48	Yes	No	Yes	No	Yes	3	No	No	Yes	No	Well	No	Negative	Nonreactive
H67	M	3	3	32		Farmer	Farmer	48	Yes	No	Yes	Yes	Yes	2	No	Yes	No	Yes	Ground water	No	Negative	Nonreactive
M01	F	23	3	30	40	Farmer	Policeman	168	No	Yes	Yes	Yes	Yes	4	No	Yes	Yes	Yes	Springs	No	Negative	Nonreactive
M02	F	2	3.3	23	39	Farmer	Driver	24	No	No	Yes	Yes	Yes	2	No	No	No	No	Tap water	No	Negative	Nonreactive
M03	M	5	3.3	25	39	Farmer	Banker	48	Yes	Yes	Yes	Yes	Yes	1	Yes	No	Yes	No	Well	No	Negative	Nonreactive
M04	F	3	3.9	33	39	Business lady	Driver	24	No	Yes	Yes	Yes	Yes	1	No	No	Yes	No	Tap water	No	Negative	Nonreactive
M05	F	3	3.5	28	40	Farmer	Farmer	24	No	Yes	Yes	Yes	Yes	2	No	No	Yes	No	Well	No	Negative	Nonreactive
M06	M	2	3	42	37	Midwife	Teacher	24	No	No	No	Yes	No	2	No		No	No	Well	No	Negative
M07	M	4	3.3	20	38	Farmer	Boda Boda	24	No	No	No	Yes	Yes	2	No	No	Yes	No	Tap water	No	Negative	Nonreactive
M08	M	1	3.4	33	40	Prison Officer	Credit officer	7	No	No	No	No	No	2	Yes	No	No	No	Tap water	No	Negative	Nonreactive
M09	M	2	3	29	40	Tailer	Carpenter	8	No	No	Yes	Yes	Yes	2	No	No	No	No	Well	No	Negative	Nonreactive
M10	F	2	2.9	18	39	Farmer	Farmer	24	No	Yes	No	Yes	Yes	2	No	No	No	No	Tap water	No	Negative
M11	M	1	2.9	35	40	Business lady	Busines man	6	No	No	No	Yes	No	2	No	No	No	No	Tap water	No	Negative	Nonreactive
M12	F	22	4.2	21	38	Farmer	Farmer	24	No	No	No	Yes	Yes	3	No	No	Yes	Yes	Tap water	No	Negative	Nonreactive
M13	F	2	3.7	26	40	Farmer	Farmer	24	No	No	No	Yes	Yes	2	No	No	Yes	No	Well	No	Negative	Nonreactive
M14	F	21	4	28	39	Farmer	Farmer	72	Yes	No	Yes	Yes	Yes	4	No	Yes	Yes	Yes	Well	No	Negative	Nonreactive
M15	M	3	2.8	22	38	House wife	Barber	24	No	No	Yes	Yes	No	2	No	No	No	No	Tap water	No	Negative	Nonreactive
M16	F	1	2.8	25	39	Business lady	Veterinarian	4	No	Yes	Yes	Yes	Yes	2	No	No	No	No	Tap water	No	Negative	Nonreactive
M17	M	2	3	28	39	Farmer	Farmer	24	No	No	Yes	Yes	Yes	3	No	No	No	No	Tap water	No	Negative	Nonreactive
M18	M	3	3.1	20	40	Farmer	Boda Boda	48	No	No	Yes	Yes	Yes	3	No	No	No	No	Well	No	Negative	Nonreactive
M19	M	2	2.9	23	39	Business lady	Busines man	17	No	No	Yes	Yes	Yes	3	No	No	No	No	Tap water	No	Negative	Nonreactive
M20	M	5	3	16	38	Farmer	Farmer	24	No	No	No	Yes	No	3	No	No	Yes	No	Well	No	Negative	Nonreactive
M21	M	3	2.9	19	40	Business lady	Driver	24	No	No	Yes	Yes	No	3	No	No	No	No	Springs	Yes	Negative	Nonreactive
M22	M	2	2.9	29	38	Teacher	Teacher	24	No	No	Yes	Yes	Yes	3	No	No	No	No	Tap water	No	Negative	Nonreactive
M23	M	2	3.7	22	39	Business lady	Driver	24	No	No	Yes	Yes	No	2	No	No	No	No	Tap water	No	Negative	Nonreactive
M24	F	2	2.5	21	39	House wife	Student	8	No	No	No	Yes	Yes	4	No	No	No	No	Tank	No	Negative	Nonreactive
M25	M	2	3.2	22	38	Farmer	Farmer	24	No	No	Yes	Yes	Yes	3	No	No	No	No	Well	No	Negative	Nonreactive
M26	F	9	3.2	32	39	House wife	Driver	24	No	No	No	Yes	Yes	4	No	Yes	Yes	Yes	Tap water	No	Negative	Nonreactive
M27	F	1	3.4	18	39	Student	Student	10	Yes	No	No	Yes	Yes	3	No	No	No	No	Tap water	No	Negative	Nonreactive
M28	F	3	3.5	25	38	Business lady	Driver	24	No	No	Yes	Yes	No	4	No	No	No	No	Tap water	No	Negative	Nonreactive
M29	F	2	3.2	20	40	House wife	Busines man	24	No	No	No	Yes	Yes	3	No	No	No	No	Tap water	No	Negative	Nonreactive
M30	M	3	2.1	22	39	Farmer	Boda Boda	24	No	No	No	Yes	No	3	No	No	No	No	Tap water	No	Negative	Nonreactive
M31	M	29	5	33	38	Farmer	Farmer	24	No	No	No	Yes	Yes	2	No	Yes	Yes	Yes	Springs	No	Negative	Nonreactive
M32	F	10	2.9	22	39	Farmer	Herdsman	48	Yes	Yes	Yes	Yes	Yes	2	Yes	No	Yes	No	Tap water	Yes	Negative	Nonreactive
M33	F	4	3.8	36	40	Farmer	Farmer	24	No	No	Yes	Yes	Yes	3	No	No	No	No	stream/River	Yes	Negative
M34	F	2	3	18	39	Farmer	Farmer	24	No	No	Yes	Yes	No	4	Yes	No	No	No	Tap water	No	Negative	Nonreactive
M35	F	3	3	32	38	Farmer	Boda Boda	24	No	No	Yes	Yes	Yes	3	No	No	No	No	Tap water	No	Negative	Nonreactive
M36	M	2	2.8	29	40	Farmer	Farmer	24	No	No	Yes	Yes	Yes	3	No	No	No	No	Well	No	Negative	Nonreactive
